1 **Polygenic risk scores for the prediction of common cancers in East Asians: A population-**  
2 **based prospective cohort study**

3  
4 Peh Joo Ho<sup>1,2,3</sup> hopj@gis.a-star.edu.sg  
5  
6 Iain Bee Huat Tan<sup>1,4,5</sup> iain.tan.b.h@singhealth.com.sg  
7  
8 Dawn Qingqing Chong<sup>5,6</sup> dawn.chong.q.q@singhealth.com.sg  
9  
10 Chiea Chuen Khor<sup>1</sup> khorcc@gis.a-star.edu.sg  
11  
12 Jian-Min Yuan<sup>7,8</sup> yuanj@upmc.edu  
13  
14 Woon-Puay Koh<sup>9,10</sup> kohwp@nus.edu.sg  
15  
16 Rajkumar Dorajoo<sup>1,#</sup> dorajoor@gis.a-star.edu.sg  
17  
18 Jingmei Li<sup>1,3,#</sup> lijim1@gis.a-star.edu.sg  
19

20 <sup>1</sup> Genome Institute of Singapore, 60 Biopolis Street, Genome, #02-01, Singapore 138672, Singapore

21 <sup>2</sup> Saw Swee Hock School of Public Health, National University of Singapore and National University  
22 Health System, Singapore

23 <sup>3</sup> Department of Surgery, Yong Loo Lin School of Medicine, National University of Singapore,  
24 Singapore

25 <sup>4</sup> Program in Cancer and Stem Cell Biology, Duke-National University of Singapore Medical School,  
26 Singapore

27 <sup>5</sup> Division of Medical Oncology, National Cancer Centre Singapore, Singapore

28 <sup>6</sup> Duke-NUS Medical School Singapore, Singapore

29 <sup>7</sup> UPMC Hillman Cancer Center, Pittsburgh, Pennsylvania, USA

30 <sup>8</sup> Department of Epidemiology, University of Pittsburgh Graduate School of Public Health, Pittsburgh,  
31 PA, USA

32 <sup>9</sup> Healthy Longevity Translational Research Programme; Yong Loo Lin School of Medicine, National  
33 University of Singapore, Singapore

34 <sup>10</sup> Singapore Institute for Clinical Sciences, Agency for Science Technology and Research (A\*STAR),  
35 Singapore 117609, Singapore

36  
37 #Correspondence to:

38 Dr Jingmei Li, Genome Institute of Singapore, 60 Biopolis Street, Genome, #02-01, Singapore  
39 138672, Singapore. Tel: (65) 6808 8312; Email: [lijim1@gis.a-star.edu.sg](mailto:lijim1@gis.a-star.edu.sg)

40  
41 Dr Rajkumar Dorajoo, Genome Institute of Singapore, 60 Biopolis Street, Genome, #02-01, Singapore  
42 138672, Singapore. Tel: (65) 6808 8201; Email: [dorajoor@gis.a-star.edu.sg](mailto:dorajoor@gis.a-star.edu.sg)

43  
44  
45  
46  
47  
48  
49  
50  
51  
52  
53  
54  
55  
56  
57

58 **ABSTRACT**

59 *Background*

60 To evaluate the utility of polygenic risk scores (PRS) in identifying high-risk individuals, different  
61 publicly available PRS for breast (n=65), prostate (n=26), colorectal (n=12) and lung cancers (n=7)  
62 were examined in a prospective study of 21,694 Chinese adults.

63

64 *Methods*

65 We constructed PRS using weights curated in the online PGS Catalog. PRS performance was  
66 evaluated by distribution, discrimination, predictive ability, and calibration. Hazard ratios (HR) and  
67 corresponding confidence intervals [CI] of the common cancers after 20 years of follow-up were  
68 estimated using Cox proportional hazard models for different levels of PRS.

69

70 *Results*

71 A total of 495 breast, 308 prostate, 332 female-colorectal, 409 male-colorectal, 181 female-lung and  
72 381 male-lung incident cancers were identified. The area under receiver operating characteristic curve  
73 for the best performing site-specific PRS were 0.61 (PGS000004, breast), 0.66 (PGS00586, prostate),  
74 0.58 (PGS000148, female-colorectal), 0.60 (PGS000734, male-colorectal) and 0.55 (PGS000740,  
75 female-lung), and 0.55 (PGS000392, male-lung), respectively. Compared to the middle quintile,  
76 individuals in the highest PRS quintile were 67% more likely to develop cancers of the breast,  
77 prostate, and colorectal. For lung cancer, the lowest PRS quintile was associated with 31-45%  
78 decreased risk compared to the middle quintile. In contrast, the hazard ratios observed for quintiles 4  
79 (female-lung: 0.91 [0.58-1.44]; male-lung: 1.01 [0.74-1.38]) and 5 (female-lung: 1.00 [0.64-1.56];  
80 male-lung: 1.07 [0.79-1.45]) were not significantly different from that for the middle quintile.

81

82 *Conclusions*

83 Site-specific PRSs can stratify the risk of developing breast, prostate, and colorectal cancers in this  
84 East Asian population. Appropriate correction factors may be required to improve calibration.

85

86 *Funding*

87 This work is supported by the National Research Foundation Singapore (NRF-NRFF2017-02),  
88 PRECISION Health Research, Singapore (PRECISE) and the Agency for Science, Technology and  
89 Research (A\*STAR). WP Koh was supported by National Medical Research Council, Singapore  
90 (NMRC/CSA/0055/2013). CC Khor was supported by National Research Foundation Singapore (NRF-  
91 NRFI2018-01). Rajkumar Dorajoo received a grant from the Agency for Science, Technology and  
92 Research Career Development Award (A\*STAR CDA - 202D8090), and from Ministry of Health  
93 Healthy Longevity Catalyst Award (HLCA20Jan-0022).  
94 The Singapore Chinese Health Study was supported by grants from the National Medical Research  
95 Council, Singapore (NMRC/CIRG/1456/2016) and the U.S. National Institutes of Health [NIH] (R01  
96 CA144034 and UM1 CA182876).

97

98 **Keywords**

99 Population-based cancer screening, polygenic risk score, cohort study, Asian, calibration

100

## 101 INTRODUCTION

102 Polygenic risk scores (PRS) for a range of health traits and conditions have been developed  
103 in recent years. These scores, which are based on summary statistics from genome-wide association  
104 studies (GWAS), can be used to stratify people depending on their genetic risk of acquiring various  
105 diseases, to improve screening and preventative interventions, as well as patient care [1, 2]. Precision  
106 risk assessment may help develop tailored screening strategies targeting individuals at higher risk of  
107 disease of interest [3].

108

109 The contributions of heritable genetic factors are different for different cancers. Twin studies  
110 have highlighted statistically significant effects of heritable genetic risk factors for cancers of the  
111 prostate, colorectal, and breast [4]. The amount of phenotypic variance explained by the common  
112 genetic variants found by GWAS is also known to vary [5], suggesting that PRS derived from GWAS  
113 findings may perform to varying degrees for different cancers.

114

115 The area under receiver operating characteristic curve (AUC) is an important discrimination  
116 index for evaluating the performance of PRS. The greater the AUC, the better the discriminatory  
117 ability to separate cases from non-cases. A value of 0.5 suggests that the tool is performing no better  
118 than chance, while a value of 1 is obtained when cases and non-cases are perfectly separated. The  
119 range of reported AUC associated with published PRS ranged from 0.584 to 0.678 for breast cancer  
120 [6-12], 0.591 to 0.769 for prostate cancer [8, 10, 13], 0.609 to 0.708 for colorectal cancer [8, 10, 14,  
121 15], and 0.52 to 0.846 for lung cancer [8, 10, 13, 16]. In a study by Jia et al looking at eight common  
122 cancers in the UK Biobank population-based cohort study (n=400,812 participants of European  
123 descent), the observed AUC ranged from 0.567 to 0.662 [10].

124

125 While prediction of individual cancer risks through PRS remains moderate, emerging data  
126 supports the use of PRS for population-based cancer risk stratification. In previous work, Ho et al  
127 examined the overlap of women identified to be at high risk of developing breast cancer based on  
128 family history for the disease, a non-genetic breast cancer risk prediction model, a breast cancer PRS,  
129 and carriership of rare pathogenic variants in established breast cancer predisposition genes [17]. The  
130 overlap of individuals found to be at elevated risk of developing breast cancer based on the genetic

131 and non-genetic models was low. PRS was also found to be able to identify high-risk individuals  
132 among young women who were not yet eligible to attend mammography screening. The findings  
133 suggest that a genetic tool that is feasible to be deployed for population-based screening may  
134 complement current screening programs.

135

136 Disparities in the genetic risk of cancer among various ancestry populations are poorly  
137 understood. Ideally, selected genetic variants that make up PRS should be relevant to the population  
138 being screened. The development of training datasets of PRS are dominated by samples of European  
139 ancestry, resulting in ancestry bias and issues with transferability to other populations [2, 18]. The  
140 mismatch between the ancestries of the GWAS samples and the target populations for PRS  
141 application is a limiting factor [18]. In this study, we evaluated the utility of common PRS, curated in  
142 the Polygenic Score (PGS) Catalog, in predicting the risk of the commonly diagnosed cancers with  
143 high genetic predisposition (breast, prostate, colorectal, and lung) in a prospective cohort comprising  
144 21,694 participants of East Asian descent in Singapore.

145

## 146 **METHODS**

147

### 148 **Singapore Chinese Health Study (SCHS)**

149 The Singapore Chinese Health Study (SCHS) is a population-based prospective cohort study  
150 of ethnic Chinese men and women recruited between April 1993 and December 1998 [19].  
151 Participants were 45–74 years old at recruitment and were restricted to the two major dialect groups  
152 of Chinese adults in Singapore, who were the Hokkiens and the Cantonese that had originated from  
153 Fujian and Guangdong provinces in Southern China, respectively. All our study participants were  
154 residents of government housing flats, which were built to accommodate approximately 86% of the  
155 resident population in Singapore during the enrolment period. A total of 63 257 individuals (35,298  
156 women and 27,959 men) provided written informed consent [19]. The study was approved by the  
157 Institutional Review Boards of the National University of Singapore, University of Pittsburgh, and the  
158 Agency for Science, Technology and Research (A\*STAR, reference number 2022-042). Written,  
159 informed consent was obtained from all study participants.

160

161 *Baseline*

162 An in-person baseline interview was performed at recruitment to collect data on diet using a  
163 validated 165-item food frequency questionnaire, smoking, alcohol, physical activity, medical history,  
164 and menstrual and reproductive history from women.

165

166 *Selection of common cancers*

167 In Singapore, between 2015 and 2019, colorectal cancer, the most prevalent cancer in men,  
168 accounted for nearly 17% of cancer diagnoses, while breast cancer, the most common cancer in  
169 women, accounted for about three out of ten cancer diagnoses (Singapore Cancer Registry Annual  
170 Report 2018). During this time, cancers of the breast, prostate, colorectal, and lung accounted for  
171 approximately half of the total cancer diagnoses. These four most common cancers were selected for  
172 inclusion in this study.

173 A unique National Registration Identity Card (NRIC) number for every Singaporean enables  
174 the compilation and linkage of data from national register data to the same individual [20].

175 Identification of incident cases of cancer was accomplished by record linkage of all surviving cohort  
176 participants with the database of the nationwide Singapore Cancer Registry [20]. Cancers that  
177 developed among SCHS participants were identified using International Classification of Diseases  
178 (ICD) codes ICD-O-3 (breast: C50, prostate: C61, colorectal: C18, C19 and C20, lung: C34).

179

180 *Follow-up*

181 Death date was obtained by record linkage with the database Birth and Death Registry of  
182 Singapore [20]. To date, only 47 (<1%) of the entire cohort participants were known to be lost to  
183 follow-up due to migration out of Singapore, suggesting that the ascertainment of cancer and death  
184 incidences among the cohort participants was virtually complete.

185

186 **Genotyping and imputation**

187 Between 1999 and 2004, a total of 28,346 subjects contributed blood samples. A total of  
188 25,273 SCHS participants were genotyped between the years 2017 to 2018 with the Illumina Infinium  
189 Global Screening Array (GSA) v1.0 and v2.0 [21].

190 Details on the sample quality control (QC) processes are previously described [21]. Briefly,  
191 samples with a call rate of 95% or below (n=176) or heterozygosity extremes (>3 standard deviation,  
192 n=236) were removed. Identity-by-state measurements were performed by pairwise comparisons of  
193 samples to detect related samples (first and second degree). One sample from each identified pair  
194 with the lower call rate was eliminated from further analysis (n=2,746). To identify any ethnic outliers,  
195 principal component analysis (PCA) was used in conjunction with 1000 Genomes Project reference  
196 populations and within the SCHS samples, which resulted in the further removal of 287 samples. Of  
197 the 21,828 samples that passed genotyping quality control, 134 participants who were diagnosed with  
198 cancer before recruitment or had missing cancer outcomes and were excluded from the study,  
199 resulting in a final analytical dataset of 21,694 (**Supplementary Figure 1**).

200 Alleles for all SNPs were coded to the forward strand and mapped to hg19. SNP quality  
201 control steps included the exclusion of sex-linked and mitochondrial variants, gross Hardy–Weinberg  
202 equilibrium (HWE) outliers ( $P < 1 \times 10^{-6}$ ), monomorphic SNPs or those with a minor allele frequency  
203 (MAF) < 1.0%, and SNPs with low call-rates (<95.0%). We imputed for additional autosomal SNPs  
204 using IMPUTE v2 [22] and with a two reference panel imputation approach by including 1) the  
205 cosmopolitan 1000 Genomes reference panels (Phase 3, representing 2,504 samples) and 2) an  
206 Asian panel comprising 4,810 Singaporeans ( 2,780 Chinese, 903 Malays, 1127 Indians) [21]. SNPs  
207 with imputation quality score INFO < 0.8, MAF < 1.0%, or HWE  $P < 1 \times 10^{-6}$ , as well as non-biallelic  
208 SNPs were excluded.

### 209 **Polygenic risk scores (PRS)**

210 Published polygenic risk scores (PRS) were retrieved from The Polygenic Score (PGS)  
211 Catalog, an open database of polygenic scores (retrieved on Feb 26, 2022) (**Additional file 1 -**  
212 **Supplementary Table 1**) [23]. Of the 2,166 PRS available in the resource, 1,706 PRS comprising  
213 less than 100,000 predictors were downloaded. A total of 65, 26, 12, and 7 PRS were available for  
214 breast, prostate, colorectal, and lung cancers, respectively. **Additional file 1 - Supplementary Table**  
215 **2** shows the number of individual variants comprising each PRS and proportion of variants missing in  
216 the SCHS cohort. Individual PRS were calculated using the allelic scoring (–score sum) functions with  
217 default parameters in PLINK (v1.90b5.2) [24].

218

219 **PRS distribution**

220 Two-sided, two-sample t-tests with a type I error of 0.05 were used to examine whether there  
221 was a difference in the distribution of standardised PRS (subtraction of mean value followed by the  
222 division by the standard deviation) between site-specific cancer cases and non-cancer controls.

223

224 **PRS discrimination**

225 Discrimination was quantified by the area under the receiver operating characteristic (ROC)  
226 curve (AUC), using logistic regression models, and their corresponding 95% CI. An AUC of 0.9–1.0 is  
227 considered excellent, 0.8–0.9 very good, 0.7–0.8 good, 0.6–0.7 sufficient, and 0.5–0.6 insufficient  
228 [25].

229

230 **Associations between PRS and risk of developing cancers**

231 Subjects were classified into PRS percentile groups. Person-years of follow-up were  
232 calculated for each subject from the date of enrolment to the date of cancer diagnosis, death, or  
233 December 31, 2015 (the date of linkage with the Singapore Cancer Registry), whichever came first.  
234 Follow-up time was censored at 20 years after recruitment. The associations between PRS quintiles  
235 (where individuals ranked by PRS were categorised into quintiles, using the middle quintile [40 to  
236 60%] as reference to reflect the average risk of the population) and the incidence of site-specific  
237 cancers were investigated using Cox proportional hazards modelling to estimate hazard ratios (HR)  
238 and corresponding 95% confidence intervals (CI), using time since recruitment as the time scale, and  
239 adjusted for age at recruitment. Tests for trends were conducted using two-sided Wald tests with a  
240 type I error of 0.05. Assumptions for proportional hazards were checked using the `cox.zph()` function  
241 in the “survival” package in R.

242

243 HR and corresponding 95% CI were also estimated for every standard deviation (SD)  
244 increase in PRS. Variables adjusted in the models included age at recruitment, dialect group (Hokkien  
245 or Cantonese), highest level of education (no formal education, primary school, or secondary or  
246 higher), body mass index (continuous,  $\text{kg/m}^2$ ), cigarette smoking (non-smoker, ex-smoker, current  
247 smoker), alcohol consumption (never, weekly, daily), moderate physical activity (none, 1-3h/week,



248  $\geq 3$ h/week), vigorous work/strenuous physical activity at least once a week (no or yes), and familial  
249 history of cancer (no or yes).

250

251 To estimate the HR for each individual, we applied the *predict()* function with option  
252 *type="risk"* to the Cox model with PRS (standardised to mean 0 and variance 1) and age at  
253 recruitment. The proportion of study participants in the cohort with a given relative risk of each site-  
254 specific cancer ( $HR_{\text{per SD increase in PRS}} = 1.5, 2.0, 2.5, \text{ and } 3.0$ ), and the percentage of at-risk individuals  
255 (based on the respective HR cut-offs) that develop cancer in all site-specific cancers were estimated.

256

### 257 **PRS predictive ability**

258 The five-year absolute risks of developing breast, prostate, colorectal, and lung cancers were  
259 computed for PRS groups of increasing five percentiles over the follow-up period. Incidence (between  
260 2013 to 2017) and mortality (the year 2016) statistics in Singapore (reported in [26] and [27],  
261 respectively) were used for the absolute risk estimations.

262

### 263 **PRS calibration**

264 Calibration was studied by comparing the expected proportion of cases in the five years after  
265 recruitment to the observed proportion of cases that occurred in that five years, within each decile of  
266 PRS. Linear regression of the ten points (pairs of expected and observed proportion) was used to  
267 study the overall calibration. A curve close to the diagonal indicates that predicted cancer risks  
268 correspond well to observed proportions. A slope above 1 implies that the model underestimates the  
269 absolute risk. Conversely, a slope below 1 implies that the model overestimates the absolute risk.

270

## 271 **RESULTS**

272

### 273 **Characteristics of the study population**

274 **Table 1** shows the characteristics of the 21,694 participants who were cancer-free at  
275 recruitment. The median follow-up time for the cohort was 20 years (IQR: 18 to 22). As of December  
276 2015, 495 women developed breast cancer, 308 men developed prostate, 774 (332 women and 409  
277 men) colorectal cancer, and 562 (181 women and 381) lung cancer. The median age at recruitment

278 was 54 years (interquartile range [IQR]: 49 to 61). The median age at diagnosis was 65 years (IQR:  
279 59-70) for female breast cancers, 72 years (IQR: 67 to 77) for prostate cancers, 71 years (IQR: 65 to  
280 76) for male colorectal cancers, 71 years (IQR: 64 to 78) for female colorectal cancers, 74 years (IQR:  
281 68 to 78) for male lung cancers and 74 years (IQR: 66 to 79) for female lung cancers. Sixteen percent  
282 of the cohort (n=3,501) reported positive first-degree family history of any cancer at baseline  
283 interview.

284

285 Overall, eight in ten participants (79%) reported an education level of primary school and  
286 above. However, the proportion of females who did not receive an education (32%) was four times  
287 higher compared to males (8%). Median BMI was 23 kg/m<sup>2</sup> in the overall cohort, as well as in sex  
288 specific and site-specific subgroups. There were more non-smokers among females (93%) compared  
289 to males (45%). Alcohol consumption was low among the participants, with 88% of the cohort  
290 reported never or occasional drinking (79% male, 95% female). Three in four participants reported  
291 regular engagement in moderate physical activity; 85% of the participants reported no participation in  
292 higher levels of physical activity.

293

#### 294 **Lack of Asian representation in PRS development**

295 Among PRS for breast (n=65), prostate (n=26), colorectal (n=12) and lung cancers (n=7)  
296 examined, the reported source of variant associations or GWAS used to build PRS were from  
297 predominantly European ancestry populations (**Additional file 1 - Supplementary Table 2**). Only one  
298 PRS for breast cancer (PGS001778) and two PRS for colorectal cancer (PGS000802 and  
299 PGS000734) were based on GWAS that included some non-European participants. For PRS  
300 development training, all but two PRS were based on samples of non-European ancestry  
301 (PGS000733 for prostate cancer and PGS000802 for colorectal cancer). No significant association  
302 (P>0.05) was found between number of variants included in the various PRS evaluated for each  
303 cancer and discriminatory ability (**Additional file 1 - Supplementary Table 3**).

304

#### 305 **PRS distribution**

306 **Figure 1** depicts the A) distribution, B) discrimination, C) predictive ability, and D) calibration  
307 of the best-performing PRS (based on AUC) (**Additional file 1 - Supplementary table 3**) for the four

308 cancers studied: breast (PGS000004), prostate (PGS00586), colorectal (female: PGS000148; male:  
309 PGS000734), and lung (female: PGS000740; male: PGS000392). All PRS were normally distributed,  
310 with a right shift observed in the distribution curves for cancer cases (**Figure 1A**). The mean value of  
311 each site-specific cancer PRS was significantly higher in cancer patients compared to controls ( $P_{t}$   
312  $_{test} < 0.00273$ ).

313

#### 314 **Associations between PRS and risk of developing cancers**

315 During the follow-up period of 20 years, the risk of acquiring breast, colorectal, or lung cancer  
316 increased significantly with higher PRS after adjusting for age at recruitment. Compared to the first  
317 PRS quintile, individuals in the highest quintile were more likely to develop the four cancers studied.  
318 The highest hazard ratio observed was for prostate cancer (4.72 [95%CI: 3.04 – 7.34]) and lowest for  
319 male lung cancer (1.54 [1.10 – 2.16]), adjusted for age at recruitment (**Additional file 1 -**  
320 **Supplementary Table 4**). Significant trends were found for the associations between PRS quintiles  
321 and site-specific cancers (P-trend ranges from  $7.30 \times 10^{-17}$  for prostate cancer to 0.029 for female lung  
322 cancer, **Additional file 1 - Supplementary Table 4**).

323

324 Compared to the middle PRS quintile, individuals in the highest PRS quintile were more than  
325 67% more likely to develop cancers of the breast, prostate, and colorectal (**Table 2**). Individuals in the  
326 lowest PRS quintile were associated with a 30-65% reduction in risk of developing these cancers. For  
327 lung cancer, the lowest PRS quintile was associated with 31-45% decreased risk compared to the  
328 middle quintile. However, the hazard ratios observed for quintiles 4 (female: 0.91 [0.58 to 1.44]; male:  
329 1.01 [0.74 to 1.38]) and 5 (female: 1.00 [0.64 to 1.56]; male: 1.07 [0.79 to 1.45]) were not significantly  
330 different when compared to the middle quintile.

331

332 Every SD increase in PRS is associated with 35-73% elevated risks of breast, prostate and  
333 colorectal cancers ( $P < 2.19 \times 10^{-7}$ , **Table 3**). The increased risk for female and male lung cancer was  
334 lower than the other three cancers ( $HR_{female}: 1.17 [1.01 \text{ to } 1.36]$ ,  $p = 4.07 \times 10^{-2}$ ;  $HR_{male}: 1.17 [1.06 \text{ to } 1.29]$ ,  
335  $p = 1.52 \times 10^{-3}$ ). Age at recruitment is significantly associated with elevated risks of developing all  
336 cancers, with the exception of female breast cancer ( $HR: 1.00 [0.99 \text{ to } 1.02]$ ,  $p = 0.571$ ). Highest  
337 education level and BMI were positively correlated with breast cancer risk. Smoking was significantly

338 associated with a ~30% reduction in risk of prostate cancer, but increased the risk of lung cancer by  
339 approximately two- and five-fold for past and current smokers, compared to non-smokers,  
340 respectively. Alcohol consumption increased the risk of both female and male colorectal cancer by  
341 approximately 60% but was only significant for male colorectal cancer. Family history of cancer was  
342 only significantly associated with an increased risk for prostate cancer (HR: 1.61 [1.22 to 2.13],  
343  $p=7.59 \times 10^{-4}$ ).

344

#### 345 **Number of cancers that developed within PRS at-risk groups**

346 Modelling (Cox proportional hazards) the risk of developing cancer using standardized PRS  
347 and accounting for age at recruitment, 14-23% of participants were at a greater than 1.5 risk of  
348 developing prostate (23%), female breast (14%) and male colorectal cancer (14%) (**Table 4**). The  
349 proportions were lower for female colorectal (6%) and lung cancer (1%). The number of participants  
350 who developed site-specific cancers in the at-risk group represented 42%, 25%, 22%, 11%, and 1%  
351 for prostate, female breast, male colorectal, female colorectal, and lung cancers, respectively. Among  
352 1,674 women who were associated with  $HR>1.5$  based on per standard deviation increase of PRS,  
353 115 breast cancers (6.9%) developed during the follow-up. This proportion is nearly twice that of  
354 women not identified to be at high risk (380/10,410, 3.7%). Among 2,220 men who were associated  
355 with  $HR>1.5$  based on per standard deviation increase of PRS, 120 prostate cancers (5.4%)  
356 developed during the follow-up. This proportion is over twice that of men not identified to be at high  
357 risk (118/7,390, 2.5%).

358

359 When age at recruitment was included in the models, 14-44% of the participants were at a  
360 greater than 1.5 risk of developing the various cancers. The number of participants who developed  
361 site-specific cancers in the at-risk group increased to 24-55%. In the fully adjusted models, 18-58%  
362 the participants were at a greater than 1.5 risk of developing the various cancers. The number of  
363 participants who developed site-specific cancers in the at-risk group increased further to 32-74%.

364

365 All Cox models presented in **Tables 2, 3** and **4** did not violate the proportionality assumption  
366 for the PRS studied ( $p$ -values of *cox-zph()* for PRS were  $>0.05$ ).

367

### 368 **PRS discriminatory ability**

369 The highest AUC obtained from logistic models was observed for prostate cancer (0.66, 95%  
370 CI: [0.62 to 0.69]), followed by female breast cancer (0.61 [0.58 to 0.63]), male colorectal cancer  
371 (0.60, 95% CI = 0.58 to 0.63), female colorectal cancer (0.58 [0.54 to 0.61]), male lung cancer (0.55  
372 [0.52 to 0.58]) and female lung cancer (0.55 [0.50 to 0.59]) (**Figure 1B**).

373

### 374 **PRS predictive ability**

375 In terms of the five-year absolute risk of developing site-specific cancers, the largest  
376 difference between the highest and lowest PRS categories was observed for prostate cancer,  
377 followed by breast cancer (**Figure 1C**). A separation of the absolute risk curves was observed for  
378 female breast cancer already at age 30 years. For prostate cancer, the separation of curves was  
379 observed only after age 50 years. Slight separation of the curves began after 50 years of age for  
380 colorectal and lung cancer.

381

### 382 **PRS calibration**

383 In general, predicted risks for the higher PRS categories did not correspond well to the  
384 observed proportions for female breast, prostate, and female lung cancers (**Figure 1D**); in particular,  
385 predicted risks were overestimated for the higher risk categories. Overestimation of risk was observed  
386 for all PRS categories for male lung cancer. In contrast, predicted risks were underestimated for both  
387 female and male colorectal cancers.

388

## 389 **DISCUSSION**

390

391 Precision prevention in oncology is based on the idea that an individual's risk, which is  
392 influenced by genetics, environment, and lifestyle factors, is linked to the amount of benefit achieved  
393 through cancer screening [28]. Risk stratification for cancer screening can be used in this framework  
394 to identify and recommend screening for persons with a high enough cancer risk that the benefits  
395 outweigh the risks. Several PRS prediction models have been established for site-specific cancers,  
396 each with its own set of strengths and limitations, and different risk models may produce different  
397 results for the same individual.

398           In an increasingly inclusive world, genetic studies fall short on diversity. According to a 2009  
399 study, an overwhelming 96% of people who took part in genome-wide association studies (GWAS)  
400 were of European ancestry [29]. GWAS results are the backbone on which PRS is developed. A  
401 concern raised was that, without representation from a broader spectrum of populations, genomic  
402 medicine may be limited to benefitting "a privileged few" [30].

403

404           Genetic studies in 2016 showed that the proportion of people not of European ancestry  
405 included in GWAS has increased to approximately 20% [30]. Most of this rise can be attributed to  
406 more research on Asian ancestry communities in Asia [30]. With increasing interest worldwide in  
407 using a risk-based approach to screening programs over the current age-based paradigm, this  
408 progress raises questions on whether selected established PRS shown to perform well in European-  
409 based populations has equal utility in Asians. Nonetheless, as our results show, most of the  
410 populations from which PRS were developed are still predominantly of European ancestry.

411

412           In accordance with published Polygenic Risk Score Reporting Standards, we reported PRS  
413 distribution, discrimination, predictive ability, and calibration for each of the four common cancers  
414 studied [31]. Our results show that cancer cases were associated with higher PRS compared to non-  
415 cancer controls. In the age-adjusted models, a constant trend between PRS percentile rank and  
416 observed cancer risk in our study population supports the validity of PRS for breast, prostate, and  
417 colorectal cancers, but not for lung cancer. The best-performing PRS for female breast cancer was  
418 able to stratify women into distinct bands of breast cancer risk at an earlier age, and across all ages,  
419 suggesting that it could be a useful prediction tool in risk-based breast cancer screening in  
420 combination with other risk factors specific to breast cancer [17]. This PRS has been incorporated into  
421 a pilot risk-based breast cancer screening study in a comparable study population [32]. The best  
422 performing PRS for prostate and male colorectal cancers in this study appeared to exhibit sufficient  
423 discriminatory ability and predictive value, especially for older participants.

424

425           PRS may be of limited use in predicting female colorectal and female/male lung cancer. The  
426 least predictive value was in lung cancer, which could be related to the higher prevalence of EGFR  
427 mutant lung cancer which has an Asian predilection, thus less amenable to PRS developed in

428 Caucasian population [33]. For these patients <10% of population were identified with >1.5 HR of  
429 developing incident cancers.

430

431         There is room for improvement in the discriminatory ability of PRS [34]. As noted by Lambert  
432 et al in a review, a wider divergence between the average scores of cases and non-cases (quantified  
433 by AUC) and associated effect sizes (odds ratio and standard deviation) is expected when PRS  
434 explains more of the heredity for each trait [2]. Larger GWAS sample sizes of appropriate ancestries  
435 and the inclusion of rarer genetic variants, obtained through other methods such as whole-genome  
436 sequencing, would likely be required to boost explained heritability [2]. In addition, group-wise  
437 estimates, which arbitrarily classify the top 10%, 5%, or 1% of samples as the at-risk group, are not  
438 optimal for decisions at the individual level [34]. Emerging new methodologies that estimate  
439 probability values for hypothetically assigning an individual as at risk or not at risk, thus providing  
440 individuals with more clarity, may help to overcome this limitation [35]. At this point, PRS may not  
441 have yet reached the standards as a clinical tool by itself. However, it is still helpful in guiding  
442 screening decisions and supplementing established protocols [1].

443

444         As highlighted by Wei et al, the reliability of score values is necessary for application at the  
445 individual level [36]. Even when the PRS have adequate discrimination, estimated risks can be  
446 unreliable [37]. Our results show that cancer risk estimates based on PRS developed using  
447 populations of European ancestry are not optimally calibrated for our Asian study population. Poorly  
448 calibrated PRS can be misleading and have clinical repercussions [37, 38]. Underestimation of risk  
449 may result in a false sense of security. Overestimation of risk may cause unnecessary anxiety,  
450 misguided interventions, and overtreatment. In a population-wide screening setting, however, where  
451 the return of PRS results can be designed such that only high-risk individuals are highlighted,  
452 underestimation of risk may be less of an issue. Arguably, with parallel input from other risk factors  
453 and evaluation by healthcare specialists, the overestimation of risk that results in a higher number of  
454 at-risk individuals identified may increase the number of cancers potentially detected early.  
455 Nonetheless, suitable correction factors will be required to ensure the reliability of PRS prior to clinical  
456 implementation.

457

458           While the study population used in this analysis comprises less than a thousand cases of the  
459 most common cancers examined, the Singapore Chinese Health Study, established between April  
460 1993 and December 1998, is one of the largest population-based Asian cohorts in the world with high-  
461 quality prospective data on exposure and comprehensive capture of morbidity and mortality. All  
462 cancer cases are incident cases diagnosed over three decades of follow-up. This is one of the best  
463 resources to evaluate the utility of PRS in a prospective manner. The findings open a window in our  
464 current understanding of which PRS is relevant and ready to be deployed in risk-based cancer  
465 screening studies.

466

467           Ethnic representation in PRS model development, PRS validation, limited discriminative  
468 ability in the general population, ill calibration, insufficient healthcare professional and patient  
469 education, and healthcare system integration are all hurdles that must be crossed before PRS can be  
470 implemented responsibly as a public health instrument [39, 40]. Importantly, genetic literacy will be a  
471 critical prerequisite for the successful implementation of PRS in population-based health screening. It  
472 is pivotal that uncertainty associated with risk estimates derived from PRS is communicated clearly  
473 [1]. In addition, an individual flagged to be at high risk of developing cancer may be unaware of the  
474 range of surveillance options available [41]. In a commentary evaluating the “right not to know” in  
475 genomics research by Gold and Green, it was noted that among those who chose not to have their  
476 results returned, nearly half of them changed their minds after an education intervention [42].

477

478           While nationwide screening programs have helped to raise cancer awareness, there is still a  
479 need to improve the effectiveness and efficiency of cancer screening in Asian countries such as  
480 Singapore, given the steadily rising incidence rates. Despite the challenges, a risk-based screening  
481 strategy that includes the use of PRS should be actively examined for research and implementation.

482

## 483 **DECLARATIONS**

### 484 **Ethics approval and consent to participate**

485 The study was approved by the institutional review boards of the University of Southern California, the  
486 National University of Singapore, and the Agency for Science, Technology and Research (A\*STAR,  
487 reference number 2022-042). Written, informed consent was obtained from all study participants.



488

489 **Consent for publication**

490 Not applicable.

491

492 **Availability of data and materials**

493 All polygenic risk scores used in this study are publicly available in the PGS Catalog

494 (<https://www.pgscatalog.org>).

495

496 The data that support the findings of our study are available from the corresponding authors of the  
497 study upon reasonable request (Dr Rajkumar s/o Dorajoo, [dorajoor@gis.a-star.edu.sg](mailto:dorajoor@gis.a-star.edu.sg) and Dr Jingmei  
498 Li, [lijm1@gis.a-star.edu.sg](mailto:lijm1@gis.a-star.edu.sg)). More information regarding the data access to SCHS can be found at:  
499 <https://sph.nus.edu.sg/research/cohort-schs/>. The data are not publicly available due to Singapore  
500 laws.

501

502 Source Data 1 contain the numerical data used to generate the figure 1.

503 The code for the study is uploaded as Source Code 1.

504

505

506 **Competing interests**

507 The authors have declared that no competing interests exist.

508

509 **Authors' contributions**

510 Conception or design of work: Jingmei Li, Peh Joo Ho, Rajkumar s/o Dorajoo

511 Acquisition of resources for the generation of data, identification of outcomes via linkage and

512 supervision for the collection of data: Woon Puay Koh (PI of the Singapore Chinese Health Study)

513 Data acquisition: Jingmei Li, Rajkumar s/o Dorajoo, Chiea Chuen Khor, Woon Puay Koh, Jian-Min

514 Yuan

515 Interpretation of data: Jingmei Li, Peh Joo Ho, Rajkumar s/o Dorajoo, Iain Bee Huat Tan

516 Drafting of manuscript: Jingmei Li, Peh Joo Ho, Rajkumar s/o Dorajoo

517 Manuscript approval: All authors

518

519 All authors agreed both to be personally accountable for the author's own contributions and to ensure  
520 that questions related to the accuracy or integrity of any part of the work, even ones in which the  
521 author was not personally involved, are appropriately investigated, resolved, and the resolution  
522 documented in the literature.

523

#### 524 **Acknowledgments**

525 We thank the Singapore Cancer Registry for the identification of incident cancer cases among  
526 participants of the Singapore Chinese Health Study and Siew-Hong Low of the National University of  
527 Singapore for supervising the fieldwork of the Singapore Chinese Health Study.

528

529

530

531

532

533

534

535

536

537

538

539

540

541

542 REFERENCES

- 543 1. Polygenic Risk Score Task Force of the International Common Disease A:  
544 **Responsible use of polygenic risk scores in the clinic: potential benefits, risks**  
545 **and gaps**. *Nat Med* 2021, **27**(11):1876-1884.
- 546 2. Lambert SA, Abraham G, Inouye M: **Towards clinical utility of polygenic risk**  
547 **scores**. *Hum Mol Genet* 2019, **28**(R2):R133-R142.
- 548 3. Clift AK, Dodwell D, Lord S, Petrou S, Brady SM, Collins GS, Hippisley-Cox J: **The**  
549 **current status of risk-stratified breast screening**. *Br J Cancer* 2022, **126**(4):533-  
550 550.
- 551 4. Lichtenstein P, Holm NV, Verkasalo PK, Iliadou A, Kaprio J, Koskenvuo M, Pukkala  
552 E, Skytthe A, Hemminki K: **Environmental and heritable factors in the causation**  
553 **of cancer--analyses of cohorts of twins from Sweden, Denmark, and Finland**. *N*  
554 *Engl J Med* 2000, **343**(2):78-85.
- 555 5. Cano-Gamez E, Trynka G: **From GWAS to Function: Using Functional Genomics**  
556 **to Identify the Mechanisms Underlying Complex Diseases**. *Front Genet* 2020,  
557 **11**:424.
- 558 6. Mavaddat N, Michailidou K, Dennis J, Lush M, Fachal L, Lee A, Tyrer JP, Chen TH,  
559 Wang Q, Bolla MK *et al*: **Polygenic Risk Scores for Prediction of Breast Cancer**  
560 **and Breast Cancer Subtypes**. *Am J Hum Genet* 2019, **104**(1):21-34.
- 561 7. Ho WK, Tan MM, Mavaddat N, Tai MC, Mariapun S, Li J, Ho PJ, Dennis J, Tyrer JP,  
562 Bolla MK *et al*: **European polygenic risk score for prediction of breast cancer**  
563 **shows similar performance in Asian women**. *Nat Commun* 2020, **11**(1):3833.
- 564 8. Kachuri L, Graff RE, Smith-Byrne K, Meyers TJ, Rashkin SR, Ziv E, Witte JS,  
565 Johansson M: **Pan-cancer analysis demonstrates that integrating polygenic risk**  
566 **scores with modifiable risk factors improves risk prediction**. *Nat Commun* 2020,  
567 **11**(1):6084.
- 568 9. Du Z, Gao G, Adedokun B, Ahearn T, Lunetta KL, Zirpoli G, Troester MA, Ruiz-  
569 Narvaez EA, Haddad SA, PalChoudhury P *et al*: **Evaluating Polygenic Risk Scores**  
570 **for Breast Cancer in Women of African Ancestry**. *J Natl Cancer Inst* 2021,  
571 **113**(9):1168-1176.
- 572 10. Jia G, Lu Y, Wen W, Long J, Liu Y, Tao R, Li B, Denny JC, Shu XO, Zheng W:  
573 **Evaluating the Utility of Polygenic Risk Scores in Identifying High-Risk**  
574 **Individuals for Eight Common Cancers**. *JNCI Cancer Spectr* 2020, **4**(3):pkaa021.
- 575 11. Lacaze P, Bakshi A, Riaz M, Orchard SG, Tiller J, Neumann JT, Carr PR, Joshi AD,  
576 Cao Y, Warner ET *et al*: **Genomic Risk Prediction for Breast Cancer in Older**  
577 **Women**. *Cancers (Basel)* 2021, **13**(14).
- 578 12. Zhang X, Rice M, Tworoger SS, Rosner BA, Eliassen AH, Tamimi RM, Joshi AD,  
579 Lindstrom S, Qian J, Colditz GA *et al*: **Addition of a polygenic risk score,**  
580 **mammographic density, and endogenous hormones to existing breast cancer**  
581 **risk prediction models: A nested case-control study**. *PLoS Med* 2018,  
582 **15**(9):e1002644.
- 583 13. Fritsche LG, Patil S, Beesley LJ, VandeHaar P, Salvatore M, Ma Y, Peng RB, Taliun  
584 D, Zhou X, Mukherjee B: **Cancer PRSweb: An Online Repository with Polygenic**  
585 **Risk Scores for Major Cancer Traits and Their Evaluation in Two Independent**  
586 **Biobanks**. *Am J Hum Genet* 2020, **107**(5):815-836.
- 587 14. Gafni A, Dite GS, Spaeth Tuff E, Allman R, Hopper JL: **Ability of known colorectal**  
588 **cancer susceptibility SNPs to predict colorectal cancer risk: A cohort study**  
589 **within the UK Biobank**. *PLoS One* 2021, **16**(9):e0251469.
- 590 15. Archambault AN, Jeon J, Lin Y, Thomas M, Harrison TA, Bishop DT, Brenner H,  
591 Casey G, Chan AT, Chang-Claude J *et al*: **Risk Stratification for Early-Onset**  
592 **Colorectal Cancer Using a Combination of Genetic and Environmental Risk**  
593 **Scores: An International Multi-Center Study**. *J Natl Cancer Inst* 2022.

- 594 16. Hung RJ, Warkentin MT, Brhane Y, Chatterjee N, Christiani DC, Landi MT, Caporaso  
595 NE, Liu G, Johansson M, Albanes D *et al*: **Assessing Lung Cancer Absolute Risk**  
596 **Trajectory Based on a Polygenic Risk Model**. *Cancer Res* 2021, **81**(6):1607-1615.
- 597 17. Ho PJ, Ho WK, Khng AJ, Yeoh YS, Tan BK, Tan EY, Lim GH, Tan SM, Tan VKM,  
598 Yip CH *et al*: **Overlap of high-risk individuals predicted by family history, and**  
599 **genetic and non-genetic breast cancer risk prediction models: implications for**  
600 **risk stratification**. *BMC Med* 2022, **20**(1):150.
- 601 18. Fritsche LG, Ma Y, Zhang D, Salvatore M, Lee S, Zhou X, Mukherjee B: **On cross-**  
602 **ancestry cancer polygenic risk scores**. *PLoS Genet* 2021, **17**(9):e1009670.
- 603 19. Hankin JH, Stram DO, Arakawa K, Park S, Low SH, Lee HP, Yu MC: **Singapore**  
604 **Chinese Health Study: development, validation, and calibration of the**  
605 **quantitative food frequency questionnaire**. *Nutr Cancer* 2001, **39**(2):187-195.
- 606 20. Emmanuel S: **Quality assurance in medicine: research and evaluation activities**  
607 **towards quality control in Singapore**. *Ann Acad Med Singap* 1993, **22**(2):129-133.
- 608 21. Chang X, Gurung RL, Wang L, Jin A, Li Z, Wang R, Beckman KB, Adams-Haduch J,  
609 Meah WY, Sim KS *et al*: **Low frequency variants associated with leukocyte**  
610 **telomere length in the Singapore Chinese population**. *Commun Biol* 2021,  
611 **4**(1):519.
- 612 22. Marchini J, Howie B, Myers S, McVean G, Donnelly P: **A new multipoint method**  
613 **for genome-wide association studies by imputation of genotypes**. *Nat Genet*  
614 2007, **39**(7):906-913.
- 615 23. Lambert SA, Gil L, Jupp S, Ritchie SC, Xu Y, Buniello A, McMahon A, Abraham G,  
616 Chapman M, Parkinson H *et al*: **The Polygenic Score Catalog as an open**  
617 **database for reproducibility and systematic evaluation**. *Nat Genet* 2021,  
618 **53**(4):420-425.
- 619 24. Chang CC, Chow CC, Tellier LC, Vattikuti S, Purcell SM, Lee JJ: **Second-**  
620 **generation PLINK: rising to the challenge of larger and richer datasets**.  
621 *Gigascience* 2015, **4**:7.
- 622 25. Simundic AM: **Measures of Diagnostic Accuracy: Basic Definitions**. *EJIFCC*  
623 2009, **19**(4):203-211.
- 624 26. **Singapore Cancer Registry 50th Anniversary Monograph (1968 – 2017)**  
625 [<https://www.nrdo.gov.sg/publications/cancer>]
- 626 27. **Age-Specific Death Rates, Annual**  
627 [<https://www.tablebuilder.singstat.gov.sg/publicfacing/viewMultiTable.action>]
- 628 28. Roberts MC: **Implementation Challenges for Risk-Stratified Screening in the Era**  
629 **of Precision Medicine**. *JAMA Oncol* 2018, **4**(11):1484-1485.
- 630 29. Need AC, Goldstein DB: **Next generation disparities in human genomics:**  
631 **concerns and remedies**. *Trends Genet* 2009, **25**(11):489-494.
- 632 30. Popejoy AB, Fullerton SM: **Genomics is failing on diversity**. *Nature* 2016,  
633 **538**(7624):161-164.
- 634 31. Wand H, Lambert SA, Tamburro C, Iacocca MA, O'Sullivan JW, Sillari C, Kullo IJ,  
635 Rowley R, Dron JS, Brockman D *et al*: **Improving reporting standards for**  
636 **polygenic scores in risk prediction studies**. *Nature* 2021, **591**(7849):211-219.
- 637 32. Liu J, Ho PJ, Tan THL, Yeoh YS, Chew YJ, Mohamed Riza NK, Khng AJ, Goh SA,  
638 Wang Y, Oh HB *et al*: **BREast screening Tailored for HEr (BREATHE)-A study**  
639 **protocol on personalised risk-based breast cancer screening programme**.  
640 *PLoS One* 2022, **17**(3):e0265965.
- 641 33. Shigematsu H, Lin L, Takahashi T, Nomura M, Suzuki M, Wistuba II, Fong KM, Lee  
642 H, Toyooka S, Shimizu N *et al*: **Clinical and biological features associated with**  
643 **epidermal growth factor receptor gene mutations in lung cancers**. *J Natl Cancer*  
644 *Inst* 2005, **97**(5):339-346.
- 645 34. Lewis ACF, Green RC: **Polygenic risk scores in the clinic: new perspectives**  
646 **needed on familiar ethical issues**. *Genome Med* 2021, **13**(1):14.
- 647 35. Sun J, Wang Y, Folkersen L, Borne Y, Amlien I, Buil A, Orho-Melander M, Borglum  
648 AD, Hougaard DM, Regeneron Genetics C *et al*: **Translating polygenic risk scores**

- 649           **for clinical use by estimating the confidence bounds of risk prediction.** *Nat*  
650           *Commun* 2021, **12**(1):5276.
- 651   36.   Wei J, Shi Z, Na R, Resurreccion WK, Wang CH, Duggan D, Zheng SL, Hulick PJ,  
652           Helfand BT, Xu J: **Calibration of polygenic risk scores is required prior to**  
653           **clinical implementation: results of three common cancers in UKB.** *J Med Genet*  
654           2022, **59**(3):243-247.
- 655   37.   Van Calster B, McLernon DJ, van Smeden M, Wynants L, Steyerberg EW, Topic  
656           Group 'Evaluating diagnostic t, prediction models' of the Si: **Calibration: the**  
657           **Achilles heel of predictive analytics.** *BMC Med* 2019, **17**(1):230.
- 658   38.   Van Calster B, Vickers AJ: **Calibration of risk prediction models: impact on**  
659           **decision-analytic performance.** *Med Decis Making* 2015, **35**(2):162-169.
- 660   39.   Lewis CM, Vassos E: **Polygenic risk scores: from research tools to clinical**  
661           **instruments.** *Genome Med* 2020, **12**(1):44.
- 662   40.   Slunecka JL, van der Zee MD, Beck JJ, Johnson BN, Finnicum CT, Pool R, Hottenga  
663           JJ, de Geus EJC, Ehli EA: **Implementation and implications for polygenic risk**  
664           **scores in healthcare.** *Hum Genomics* 2021, **15**(1):46.
- 665   41.   Gold NB, Green RC: **Reevaluating the "right not to know" in genomics research.**  
666           *Genet Med* 2022, **24**(2):289-292.
- 667   42.   Schupmann W, Miner SA, Sullivan HK, Glover JR, Hall JE, Schurman SH, Berkman  
668           BE: **Exploring the motivations of research participants who chose not to learn**  
669           **medically actionable secondary genetic findings about themselves.** *Genet Med*  
670           2021, **23**(12):2281-2288.
- 671  
672  
673

It is made available under a [CC-BY 4.0 International license](https://creativecommons.org/licenses/by/4.0/).

674 **Table 1.** Demographics of our study population by gender and cancer site. Demographics variables  
 675 were collected using structured questionnaire at recruitment. Family history for lung cancer was not  
 676 available. Information on cancer occurrence (number of cancer and age at cancer occurrence) was  
 677 obtained through linkage with the Singapore Cancer Registry in December 2015. Follow-up time was  
 678 calculated from age at recruitment. IQR: Interquartile range.  
 679

|                                                                                                                                | Entire cohort |            |            | Individuals who developed cancer |            |            |            |            |            |
|--------------------------------------------------------------------------------------------------------------------------------|---------------|------------|------------|----------------------------------|------------|------------|------------|------------|------------|
|                                                                                                                                | All           | Female     | Male       | Breast                           | Prostate   | Colorectal |            | Lung       |            |
|                                                                                                                                |               |            |            | Female                           | Male       | Female     | Male       | Female     | Male       |
| <i>n</i>                                                                                                                       | 21694         | 12084      | 9610       | 495                              | 308        | 332        | 409        | 181        | 381        |
| Age at recruitment in years, median (IQR)                                                                                      | 54 (49–61)    | 54 (48–60) | 55 (49–62) | 53 (48-59)                       | 59 (54-64) | 58 (52-64) | 59 (52-65) | 59 (55-64) | 60 (55-64) |
| Number of cancers developed                                                                                                    |               |            |            |                                  |            |            |            |            |            |
| 0 (did not develop cancer)                                                                                                     | 19633 (90)    | 11096 (92) | 8537 (89)  | -                                | -          | -          | -          | -          | -          |
| 1                                                                                                                              | 2013 (9)      | 968 (8)    | 1045 (11)  | 476 (96)                         | 293 (95)   | 317 (95)   | 387 (95)   | 175 (97)   | 362 (95)   |
| 2                                                                                                                              | 48 (0)        | 20 (0)     | 28 (0)     | 19 (4)                           | 15 (5)     | 15 (5)     | 22 (5)     | 6 (3)      | 19 (5)     |
| Age at diagnosis among individuals who develop cancer(s) (earliest age for those with multiple cancers) in years, median (IQR) | 70 (64-77)    | 68 (62-76) | 72 (67-77) | 65 (59-70)                       | 72 (67-77) | 71 (64-78) | 71 (65-6)  | 74 (66-79) | 74 (68-78) |
| Length of follow-up (longest follow-up for those with multiple cancers) in years, median (IQR)                                 | 20 (18- 22)   | 20 (18-22) | 19 (17-21) | 11 (6-16)                        | 13 (9-17)  | 13 (8-17)  | 11 (7-16)  | 14 (9-17)  | 14 (10-17) |
| Dialect group (%)                                                                                                              |               |            |            |                                  |            |            |            |            |            |
| Hokkien                                                                                                                        | 10663 (49)    | 6132 (51)  | 4531 (47)  | 260 (53)                         | 153 (50)   | 185 (56)   | 164 (40)   | 95 (52)    | 162 (43)   |
| Cantonese                                                                                                                      | 11031 (51)    | 5952 (49)  | 5079 (53)  | 235 (47)                         | 155 (50)   | 147 (44)   | 245 (60)   | 86 (48)    | 219 (57)   |
| Highest education (%)                                                                                                          |               |            |            |                                  |            |            |            |            |            |
| No                                                                                                                             | 4629 (21)     | 3878 (32)  | 751 (8)    | 128 (26)                         | 20 (6)     | 123 (37)   | 46 (11)    | 85 (47)    | 57 (15)    |
| Primary level                                                                                                                  | 9760 (45)     | 5082 (42)  | 4678 (49)  | 206 (42)                         | 146 (47)   | 138 (42)   | 232 (57)   | 62 (34)    | 228 (60)   |
| Secondary or above                                                                                                             | 7305 (34)     | 3124 (26)  | 4181 (44)  | 161 (33)                         | 142 (46)   | 71 (21)    | 131 (32)   | 34 (19)    | 96 (25)    |
| Body mass index in kg/m <sup>2</sup> , median (IQR)                                                                            | 23 (21-25)    | 23 (21-25) | 23 (21-25) | 23 (21-25)                       | 23 (21-25) | 23 (21-24) | 23 (21-25) | 23 (20-24) | 23 (20-24) |
| Smoking status (%)                                                                                                             |               |            |            |                                  |            |            |            |            |            |
| Never                                                                                                                          | 15553 (72)    | 11235 (93) | 4318 (45)  | 472 (95)                         | 166 (54)   | 296 (89)   | 153 (37)   | 129 (71)   | 63 (17)    |
| Ex-smoker                                                                                                                      | 2374 (11)     | 261 (2)    | 2113 (22)  | 8 (2)                            | 66 (21)    | 14 (4)     | 108 (26)   | 9 (5)      | 74 (19)    |
| Current smoker                                                                                                                 | 3767 (17)     | 588 (5)    | 3179 (33)  | 15 (3)                           | 76 (25)    | 22 (7)     | 148 (36)   | 43 (24)    | 244 (64)   |
| Number of cigarettes smoked (%)                                                                                                |               |            |            |                                  |            |            |            |            |            |
| Does not smoke                                                                                                                 | 15553 (72)    | 11235 (93) | 4318 (45)  | 472 (95)                         | 166 (54)   | 296 (89)   | 153 (37)   | 129 (71)   | 63 (17)    |
| <12                                                                                                                            | 2408 (11)     | 581 (5)    | 1827 (19)  | 14 (3)                           | 54 (18)    | 26 (8)     | 85 (21)    | 36 (20)    | 81 (21)    |
| 13-22                                                                                                                          | 2344 (11)     | 206 (2)    | 2138 (22)  | 6 (1)                            | 53 (17)    | 9 (3)      | 108 (26)   | 15 (8)     | 135 (35)   |
| >=23                                                                                                                           | 1389 (6)      | 62 (1)     | 1327 (14)  | 3 (1)                            | 35 (11)    | 1 (0)      | 63 (15)    | 1 (1)      | 102 (27)   |
| Alcohol consumption (%)                                                                                                        |               |            |            |                                  |            |            |            |            |            |
| Never/ occasionally                                                                                                            | 19079 (88)    | 11506 (95) | 7573 (79)  | 470 (95)                         | 253 (82)   | 315 (95)   | 303 (74)   | 174 (96)   | 296 (78)   |
| Weekly                                                                                                                         | 1885 (9)      | 437 (4)    | 1448 (15)  | 20 (4)                           | 44 (14)    | 10 (3)     | 66 (16)    | 5 (3)      | 49 (13)    |
| Daily                                                                                                                          | 730 (3)       | 141 (1)    | 589 (6)    | 5 (1)                            | 11 (4)     | 7 (2)      | 40 (10)    | 2 (1)      | 36 (9)     |
| Moderate physical activity (%)                                                                                                 |               |            |            |                                  |            |            |            |            |            |
| No                                                                                                                             | 16584 (76)    | 9446 (78)  | 7138 (74)  | 380 (77)                         | 208 (68)   | 269 (81)   | 295 (72)   | 143 (79)   | 294 (77)   |
| 1 to 3 hours/week                                                                                                              | 3274 (15)     | 1679 (14)  | 1595 (17)  | 69 (14)                          | 62 (20)    | 43 (13)    | 68 (17)    | 23 (13)    | 53 (14)    |
| >= 3 hours/week                                                                                                                | 1836 (8)      | 959 (8)    | 877 (9)    | 46 (9)                           | 38 (12)    | 20 (6)     | 46 (11)    | 15 (8)     | 34 (9)     |
| Vigorous physical activity/ strenuous sports at least once a week (%)                                                          |               |            |            |                                  |            |            |            |            |            |
| No                                                                                                                             | 18467 (85)    | 11221 (93) | 7246 (75)  | 452 (91)                         | 239 (78)   | 311 (94)   | 342 (84)   | 175 (97)   | 314 (82)   |
| Yes                                                                                                                            | 3227 (15)     | 863 (7)    | 2364 (25)  | 43 (9)                           | 69 (22)    | 21 (6)     | 67 (16)    | 6 (3)      | 67 (18)    |
| Family history of any cancer in first degree relatives (%)                                                                     |               |            |            |                                  |            |            |            |            |            |
| No                                                                                                                             | 18193 (84)    | 10141 (84) | 8052 (84)  | 404 (82)                         | 236 (77)   | 281 (85)   | 336 (82)   | 165 (91)   | 333 (87)   |
| Yes                                                                                                                            | 3501 (16)     | 1943 (16)  | 1558 (16)  | 91 (18)                          | 72 (23)    | 51 (15)    | 73 (18)    | 16 (9)     | 48 (13)    |

It is made available under a [CC-BY 4.0 International license](https://creativecommons.org/licenses/by/4.0/) .

680 **Table 2.** Hazard ratios (HR) and corresponding 95% confidence intervals (CI) associated with  
 681 polygenic risk score quintiles (Q) compared to the population median, using the Cox proportional  
 682 hazards model and censored at 20 years after recruitment. All models were adjusted for age at  
 683 recruitment.  
 684

| Cancer site - gender       | Q1                 | Q2                 | Q3              | Q4                 | Q5                 |
|----------------------------|--------------------|--------------------|-----------------|--------------------|--------------------|
| <b>Breast – Female</b>     |                    |                    |                 |                    |                    |
| Number of cases            | 54                 | 76                 | 86              | 103                | 147                |
| HR (95%CI)                 | 0.60 (0.43 – 0.84) | 0.84 (0.62 – 1.14) | 1.00 (Referent) | 1.19 (0.89 – 1.58) | 1.67 (1.28 – 2.17) |
| <b>Prostate – Male</b>     |                    |                    |                 |                    |                    |
| Number of cases            | 24                 | 27                 | 68              | 59                 | 111                |
| HR (95%CI)                 | 0.35 (0.22 – 0.57) | 0.42 (0.27 – 0.65) | 1.00 (Referent) | 0.89 (0.63 – 1.26) | 1.67 (1.24 – 2.26) |
| <b>Colorectal – Female</b> |                    |                    |                 |                    |                    |
| Number of cases            | 37                 | 63                 | 51              | 74                 | 85                 |
| HR (95%CI)                 | 0.70 (0.46 – 1.07) | 1.25 (0.87 – 1.81) | 1.00 (Referent) | 1.48 (1.04 – 2.12) | 1.69 (1.19 – 2.39) |
| <b>Colorectal – Male</b>   |                    |                    |                 |                    |                    |
| Number of cases            | 36                 | 70                 | 71              | 87                 | 114                |
| HR (95%CI)                 | 0.51 (0.34 – 0.77) | 1.00 (0.72 – 1.39) | 1.00 (Referent) | 1.29 (0.94 – 1.76) | 1.67 (1.24 – 2.25) |
| <b>Lung – Female</b>       |                    |                    |                 |                    |                    |
| Number of cases            | 22                 | 33                 | 39              | 35                 | 39                 |
| HR (95%CI)                 | 0.55 (0.32 – 0.92) | 0.81 (0.51 – 1.28) | 1.00 (Referent) | 0.91 (0.58 – 1.44) | 1.00 (0.64 – 1.56) |
| <b>Lung – Male</b>         |                    |                    |                 |                    |                    |
| Number of cases            | 56                 | 64                 | 79              | 75                 | 86                 |
| HR (95%CI)                 | 0.69 (0.49 – 0.97) | 0.80 (0.57 – 1.11) | 1.00 (Referent) | 1.01 (0.74 – 1.38) | 1.07 (0.79 – 1.45) |

685  
686  
687  
688

**Table 3.** Associations between per standard deviation (SD) increase in site-specific polygenic risk scores and cancer occurrence. Hazard ratios (HR) and corresponding 95% confidence intervals (CI) were estimated using Cox proportional hazard models, adjusted for age at recruitment, dialect group, highest education attained, body mass index, smoking status, alcohol consumption, and physical activity. Follow-up time was censored at 20 years after recruitment. Significant results are shown in bold.

|                                                                              | Cancer site               |                 |                           |                 |                           |                 |                           |                 |                           |                 |                           |                 |
|------------------------------------------------------------------------------|---------------------------|-----------------|---------------------------|-----------------|---------------------------|-----------------|---------------------------|-----------------|---------------------------|-----------------|---------------------------|-----------------|
|                                                                              | Breast                    |                 | Prostate                  |                 | Colorectal - female       |                 | Colorectal - male         |                 | Lung - female             |                 | Lung - male               |                 |
|                                                                              | HR (95% CI)               | P-value         | HR (95% CI)               | P-value         | HR (95% CI)               | P-value         | HR (95% CI)               | P-value         | HR (95% CI)               | P-value         | HR (95% CI)               | P-value         |
| Site-specific polygenic risk score, per SD increase                          | <b>1.46 (1.33 – 1.59)</b> | <b>3.83E-16</b> | <b>1.73 (1.54 – 1.95)</b> | <b>2.31E-20</b> | <b>1.35 (1.20 – 1.51)</b> | <b>2.19E-07</b> | <b>1.44 (1.30 – 1.59)</b> | <b>5.41E-12</b> | <b>1.17 (1.01 – 1.36)</b> | <b>4.07E-02</b> | <b>1.17 (1.06 – 1.29)</b> | <b>2.52E-03</b> |
| Age at recruitment, years                                                    | 1.00 (0.99 – 1.02)        | 5.71E-01        | <b>1.08 (1.06 – 1.10)</b> | <b>9.37E-22</b> | <b>1.07 (1.05 – 1.09)</b> | <b>1.00E-16</b> | <b>1.06 (1.05 – 1.08)</b> | <b>9.53E-18</b> | <b>1.07 (1.05 – 1.10)</b> | <b>1.90E-10</b> | <b>1.09 (1.07 – 1.10)</b> | <b>2.54E-27</b> |
| Dialect group (Cantonese vs Hokkien)                                         | 0.90 (0.74 – 1.08)        | 2.47E-01        | 0.98 (0.77 – 1.23)        | 8.35E-01        | 0.80 (0.64 – 1.01)        | 6.47E-02        | 1.22 (0.99 – 1.50)        | 6.78E-02        | 0.92 (0.67 – 1.26)        | 5.97E-01        | 1.06 (0.86 – 1.31)        | 5.95E-01        |
| Highest education (Primary vs No)                                            | 1.21 (0.95 – 1.53)        | 1.25E-01        | 1.28 (0.79 – 2.08)        | 3.19E-01        | 1.08 (0.83 – 1.40)        | 5.73E-01        | 0.98 (0.70 – 1.37)        | 8.91E-01        | 0.83 (0.58 – 1.19)        | 3.14E-01        | 0.90 (0.66 – 1.22)        | 4.98E-01        |
| Highest education (Secondary or above vs No)                                 | <b>1.54 (1.18 – 2.01)</b> | <b>1.55E-03</b> | 1.54 (0.93 – 2.53)        | 9.01E-02        | 1.06 (0.76 – 1.48)        | 7.41E-01        | 0.80 (0.55 – 1.16)        | 2.33E-01        | 1.09 (0.69 – 1.73)        | 7.18E-01        | 0.65 (0.46 – 0.93)        | 1.89E-02        |
| Body mass index, kg/m <sup>2</sup>                                           | <b>1.04 (1.02 – 1.07)</b> | <b>9.12E-04</b> | 1.01 (0.98 – 1.05)        | 4.51E-01        | 0.99 (0.96 – 1.02)        | 5.42E-01        | 1.02 (0.98 – 1.05)        | 3.19E-01        | 0.97 (0.92 – 1.01)        | 1.57E-01        | 0.96 (0.93 – 1.00)        | 4.93E-02        |
| Smoking status (Ex-smoker vs Non-smoker)                                     | 0.90 (0.44 – 1.82)        | 7.70E-01        | <b>0.71 (0.52 – 0.96)</b> | <b>2.42E-02</b> | 1.50 (0.85 – 2.64)        | 1.59E-01        | 1.17 (0.90 – 1.52)        | 2.36E-01        | <b>2.16 (1.04 – 4.48)</b> | <b>3.82E-02</b> | <b>1.98 (1.39 – 2.80)</b> | <b>1.32E-04</b> |
| Smoking status (Current smoker vs Non-smoker)                                | 0.84 (0.50 – 1.41)        | 4.99E-01        | <b>0.72 (0.54 – 0.97)</b> | <b>2.85E-02</b> | 1.12 (0.70 – 1.78)        | 6.36E-01        | 1.22 (0.96 – 1.56)        | 1.08E-01        | <b>5.71 (3.93 – 8.29)</b> | <b>4.81E-20</b> | <b>5.02 (3.74 – 6.74)</b> | <b>6.26E-27</b> |
| Alcohol consumption (Weekly vs Never/Occasionally)                           | 1.04 (0.65 – 1.67)        | 8.68E-01        | 0.96 (0.68 – 1.36)        | 8.31E-01        | 0.76 (0.38 – 1.54)        | 4.45E-01        | 1.31 (1.00 – 1.73)        | 5.39E-02        | 0.72 (0.27 – 1.94)        | 5.12E-01        | 0.90 (0.66 – 1.23)        | 5.18E-01        |
| Alcohol consumption (Daily vs Never/Occasionally)                            | 0.73 (0.27 – 1.97)        | 5.39E-01        | 0.70 (0.38 – 1.29)        | 2.54E-01        | 1.60 (0.71 – 3.60)        | 2.58E-01        | <b>1.64 (1.15 – 2.34)</b> | <b>6.54E-03</b> | 0.67 (0.17 – 2.72)        | 5.76E-01        | 1.23 (0.87 – 1.76)        | 2.42E-01        |
| Moderate physical activity (1-3 hours/week vs No)                            | 0.98 (0.75 – 1.27)        | 8.61E-01        | 1.16 (0.87 – 1.56)        | 3.13E-01        | 0.89 (0.63 – 1.24)        | 4.81E-01        | 1.02 (0.78 – 1.35)        | 8.79E-01        | 1.01 (0.63 – 1.61)        | 9.62E-01        | 0.88 (0.65 – 1.20)        | 4.32E-01        |
| Moderate physical activity (≥3 hours/week vs No)                             | 1.18 (0.86 – 1.61)        | 3.03E-01        | 1.05 (0.72 – 1.54)        | 7.81E-01        | <b>0.60 (0.37 – 0.97)</b> | <b>3.57E-02</b> | 1.10 (0.80 – 1.52)        | 5.45E-01        | 0.95 (0.53 – 1.68)        | 8.52E-01        | 0.84 (0.57 – 1.22)        | 3.51E-01        |
| Vigorous physical activity/strenuous sports at least once a week (Yes vs No) | 1.24 (0.90 – 1.70)        | 1.88E-01        | 1.09 (0.82 – 1.45)        | 5.65E-01        | 1.08 (0.67 – 1.72)        | 7.62E-01        | 0.75 (0.57 – 1.00)        | 5.06E-02        | 0.57 (0.23 – 1.40)        | 2.22E-01        | 0.94 (0.71 – 1.25)        | 6.77E-01        |
| Family history (Yes vs No)                                                   | 1.15 (0.91 – 1.45)        | 2.53E-01        | <b>1.61 (1.22 – 2.13)</b> | <b>7.59E-04</b> | 1.08 (0.79 – 1.48)        | 6.17E-01        | 1.24 (0.95 – 1.62)        | 1.09E-01        | 0.67 (0.40 – 1.13)        | 1.36E-01        | 0.96 (0.71 – 1.32)        | 8.15E-01        |

689

medRxiv preprint doi: <https://doi.org/10.1101/2022.09.12.22279874>; this version posted September 15, 2022. The copyright holder for this preprint (which was not certified by peer review) is the author/funder, who has granted medRxiv a license to display the preprint in perpetuity. It is made available under a [CC-BY 4.0 International license](#).



690  
691  
692  
693

**Table 4.** Number of individuals estimated to have a hazard ratio (HR) associated with per standard deviation increase in site-specific polygenic risk score above the arbitrary threshold (1.5, 2.0, 2.5 and 3.0). To estimate the HR for each individual, we applied the *predict()* function with option *type="risk"* to the Cox model with PRS (standardised to mean 0 and variance 1) and age at recruitment.

| Cancer site - gender              | HR ≥ 1.5                            |                                                   | HR ≥ 2.0                            |                                                   | HR ≥ 2.5                         |                                                   | HR ≥ 3.0                         |                                                   |
|-----------------------------------|-------------------------------------|---------------------------------------------------|-------------------------------------|---------------------------------------------------|----------------------------------|---------------------------------------------------|----------------------------------|---------------------------------------------------|
|                                   | <i>n</i><br>(% of study population) | Number who developed cancer<br>(% of total cases) | <i>n</i><br>(% of study population) | Number who developed cancer<br>(% of total cases) | <i>n</i><br>(% of total in SCHS) | Number who developed cancer<br>(% of total cases) | <i>n</i><br>(% of total in SCHS) | Number who developed cancer<br>(% of total cases) |
| Effect of PRS alone               |                                     |                                                   |                                     |                                                   |                                  |                                                   |                                  |                                                   |
| Breast – female                   | 1674 (14)                           | 115 (25)                                          | 373 (3)                             | 27 (6)                                            | 84 (1)                           | 10 (2)                                            | 27 (0)                           | 2 (0)                                             |
| Prostate – male                   | 2220 (23)                           | 120 (42)                                          | 981 (10)                            | 61 (21)                                           | 439 (5)                          | 32 (11)                                           | 210 (2)                          | 19 (7)                                            |
| Colorectal – female               | 756 (6)                             | 33 (11)                                           | 48 (0)                              | 0 (0)                                             | 1 (0)                            | 0 (0)                                             | 0 (0)                            | 0 (0)                                             |
| Colorectal – male                 | 1300 (14)                           | 82 (22)                                           | 291 (3)                             | 23 (6)                                            | 72 (1)                           | 10 (3)                                            | 15 (0)                           | 3 (1)                                             |
| Lung – female                     | 73 (1)                              | 1 (1)                                             | 0 (0)                               | 0 (0)                                             | 0 (0)                            | 0 (0)                                             | 0 (0)                            | 0 (0)                                             |
| Lung – male                       | 52 (1)                              | 2 (1)                                             | 0 (0)                               | 0 (0)                                             | 0 (0)                            | 0 (0)                                             | 0 (0)                            | 0 (0)                                             |
| Total – females                   | 2326 (19)                           | 148 (19)                                          | 418 (3)                             | 27 (4)                                            | 84 (1)                           | 10 (1)                                            | 27 (0)                           | 2 (0)                                             |
| Total – males                     | 3250 (34)                           | 204 (20)                                          | 1240 (13)                           | 84 (8)                                            | 509 (5)                          | 42 (4)                                            | 224 (2)                          | 22 (2)                                            |
| Adjusted for age at recruitment   |                                     |                                                   |                                     |                                                   |                                  |                                                   |                                  |                                                   |
| Breast – female                   | 1698 (14)                           | 112 (24)                                          | 373 (3)                             | 26 (6)                                            | 86 (1)                           | 10 (2)                                            | 29 (0)                           | 2 (0)                                             |
| Prostate – male                   | 2854 (30)                           | 158 (55)                                          | 1834 (19)                           | 118 (41)                                          | 1192 (12)                        | 83 (29)                                           | 817 (9)                          | 63 (22)                                           |
| Colorectal – female               | 2887 (24)                           | 138 (45)                                          | 1561 (13)                           | 92 (30)                                           | 850 (7)                          | 57 (18)                                           | 447 (4)                          | 34 (11)                                           |
| Colorectal – male                 | 2510 (26)                           | 175 (46)                                          | 1443 (15)                           | 119 (31)                                          | 832 (9)                          | 71 (19)                                           | 476 (5)                          | 39 (10)                                           |
| Lung – female                     | 3279 (27)                           | 91 (54)                                           | 2104 (17)                           | 62 (37)                                           | 1360 (11)                        | 42 (25)                                           | 925 (8)                          | 29 (17)                                           |
| Lung – male                       | 2732 (28)                           | 177 (49)                                          | 1687 (18)                           | 107 (30)                                          | 1035 (11)                        | 73 (20)                                           | 653 (7)                          | 41 (11)                                           |
| Total – females                   | 4273 (35)                           | 249 (33)                                          | 1903 (16)                           | 118 (15)                                          | 933 (8)                          | 67 (9)                                            | 476 (4)                          | 36 (5)                                            |
| Total – males                     | 4189 (44)                           | 498 (50)                                          | 2821 (29)                           | 336 (34)                                          | 1914 (20)                        | 221 (22)                                          | 1324 (14)                        | 140 (14)                                          |
| Fully adjusted for all covariates |                                     |                                                   |                                     |                                                   |                                  |                                                   |                                  |                                                   |
| Breast – female                   | 2209 (18)                           | 150 (32)                                          | 760 (6)                             | 61 (13)                                           | 257 (2)                          | 25 (5)                                            | 86 (1)                           | 12 (3)                                            |
| Prostate – male                   | 3000 (31)                           | 179 (62)                                          | 1947 (20)                           | 135 (47)                                          | 1319 (14)                        | 105 (36)                                          | 956 (10)                         | 75 (26)                                           |
| Colorectal – female               | 3006 (25)                           | 143 (46)                                          | 1663 (14)                           | 94 (30)                                           | 935 (8)                          | 60 (19)                                           | 548 (5)                          | 37 (12)                                           |
| Colorectal – male                 | 2803 (29)                           | 204 (54)                                          | 1666 (17)                           | 134 (35)                                          | 1041 (11)                        | 97 (26)                                           | 640 (7)                          | 58 (15)                                           |
| Lung – female                     | 3111 (26)                           | 98 (58)                                           | 2027 (17)                           | 78 (46)                                           | 1402 (12)                        | 64 (38)                                           | 1062 (9)                         | 59 (35)                                           |
| Lung – male                       | 3572 (37)                           | 265 (74)                                          | 2734 (28)                           | 232 (64)                                          | 2134 (22)                        | 206 (57)                                          | 1684 (18)                        | 180 (50)                                          |
| Total – females                   | 4783 (40)                           | 291 (38)                                          | 2363 (20)                           | 155 (20)                                          | 1181 (10)                        | 85 (11)                                           | 633 (5)                          | 49 (6)                                            |
| Total – males                     | 5542 (58)                           | 633 (63)                                          | 4191 (44)                           | 492 (49)                                          | 3247 (34)                        | 400 (40)                                          | 2547 (27)                        | 307 (31)                                          |

694  
695  
696  
697  
698  
699  
700

**Figure 1. Site-specific polygenic risk scores (PRS) performance assessment.**

A) Distribution, B) discrimination, C) predictive ability and D) calibration for each of the four common cancers studied. Two-sided, two-sample t-tests with a type I error of 0.05 were used to examine whether there was a difference in the distribution of standardised PRS (subtraction of mean value followed by the division by the standard deviation) between site-specific cancer cases and non-cancer controls (A). The PRS showcased are the best-performing scores based on Area Under the Receiver Operator Characteristic Curve (AUC) values in the female and male populations, i) unadjusted [solid line], and ii) adjusted for age at recruitment [dashed line] (B). Each colored line in the plots for predictive ability denotes a five percentile increase in the standardised PRS score in (C). Calibration calculated based on five-year absolute risk by PRS deciles in (D). A prediction tool is considered more accurate when the AUC is larger. An AUC of 0.9–1.0 is considered excellent, 0.8–0.9 very good, 0.7–0.8 good, 0.6–0.7 sufficient, 0.5–0.6 bad, and less than 0.5 considered not useful (PMID: 27683318).

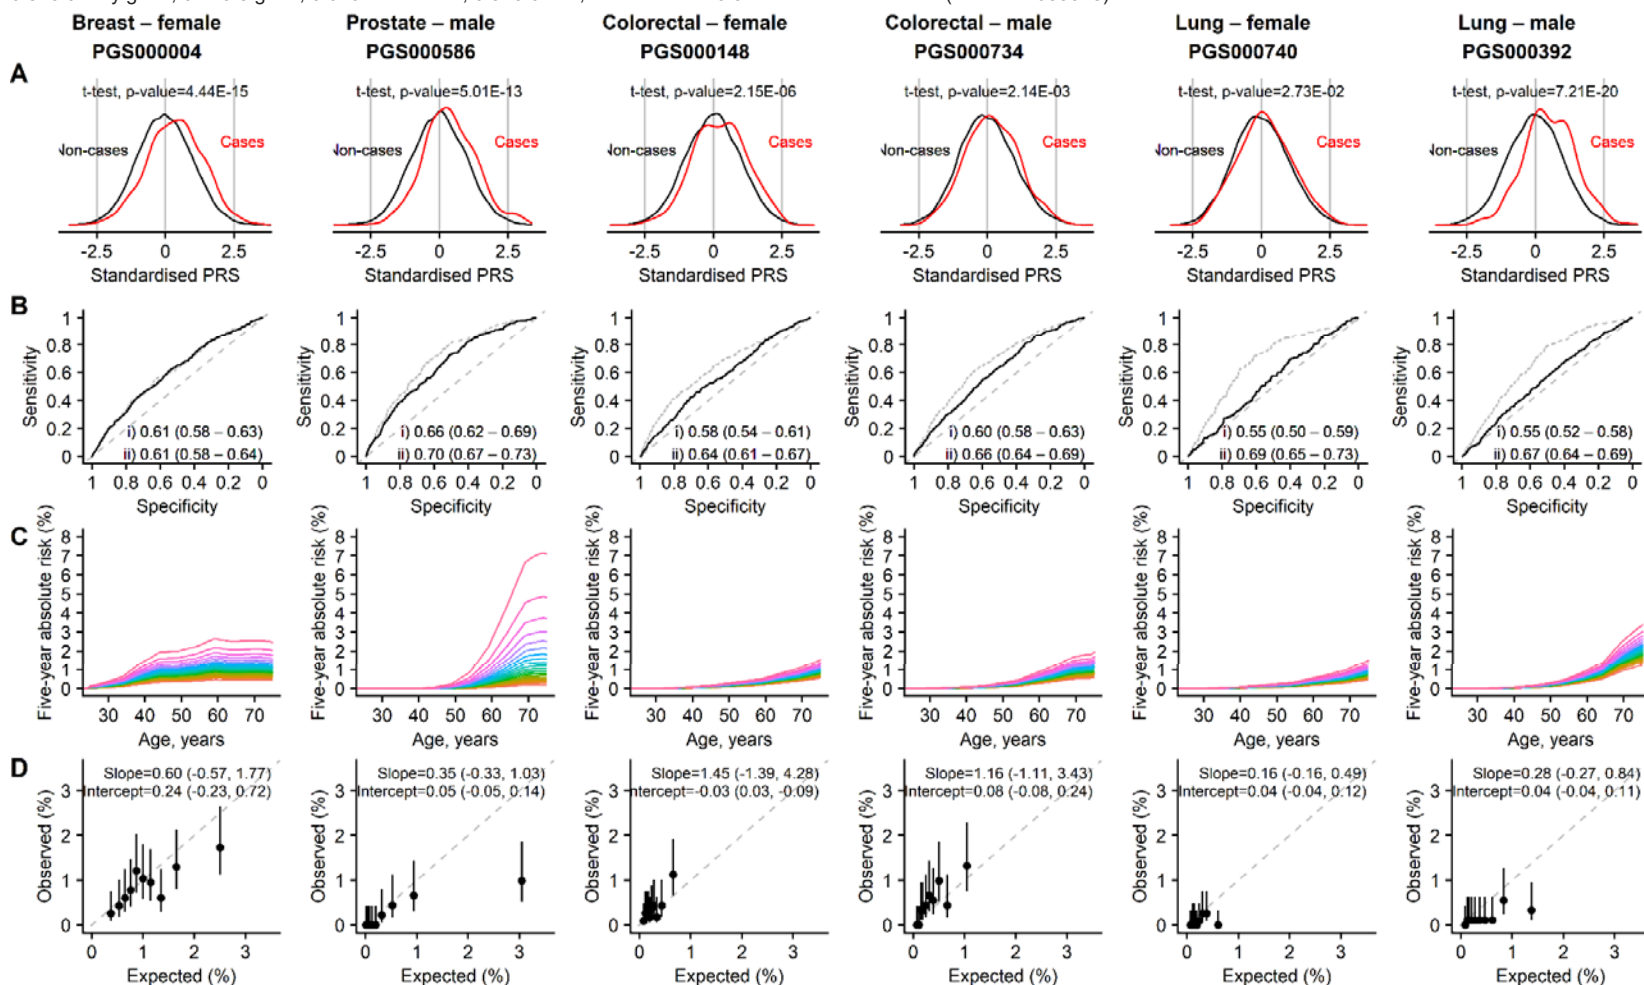

701

It is made available under a [CC-BY 4.0 International license](#) .

702 **ADDITIONAL FILES**

703 Additional File 1 - Supplementary tables.xlsx
